# Supplementary material for: Clinically Delivered Treatment for Glioma Patients on Hybrid Magnetic Resonance Imaging (MRI)-Linear Accelerator (MR-Linac) versus Cone Beam CT (CBCT)-Guided Linac
Source: Research Square preprint supplement (doi:10.21203/rs.3.rs-1143687/v1), 2021-12-20

**SUPPLEMENTARY MATERIAL**

**Supplementary Table 1**. Planning dose constraints for organs-at-risk (OARs) for MR-Linac and conventional Linac treatment plans prescribed 60 Gy in 30 fractions.

| OARs | MR-Linac  Dose Constraint | Conventional Linac  Dose Constraint |
| --- | --- | --- |
| Brainstem | D0.1cc (Gy) < 60 Gy | Dmax < 60 Gy |
| Optic Chiasm | D0.03cc (Gy) < 55 Gy | Dmax < 55 Gy |
| Optic Nerve | D0.03cc (Gy) < 55 Gy | Dmax < 55 Gy |
| Globe | D0.03cc (Gy) < 50 Gy | Dmax < 45 Gy |
| Lens | D0.03cc (Gy) < 10 Gy | Dmax < 10 Gy |

**Supplementary Equations**

[Equation 1]

HI = Homogeneity Index

D2% = Dose to 2% of the target volume

D98% = Dose to 98% of the target volume

D100% = Prescription dose

[Equation 2]

GI = Gradient Index

PIV50% = Volume of the 50% prescription isodose

PIV100% = Volume of the 100% prescription isodose

[Equation 3]

CI = Conformity Index

TV = Target Volume

PIV = Prescription Isodose Volume

TVPIV = Target Volume Covered by the Prescription Isodose Volume

**Supplementary Figure 1**

Skin and tissues surrounding air cavities for a representative study patient diagnosed with glioblastoma depicted on axial (a), coronal (b), and sagittal (c) views. PTV is depicted in blue colorwash


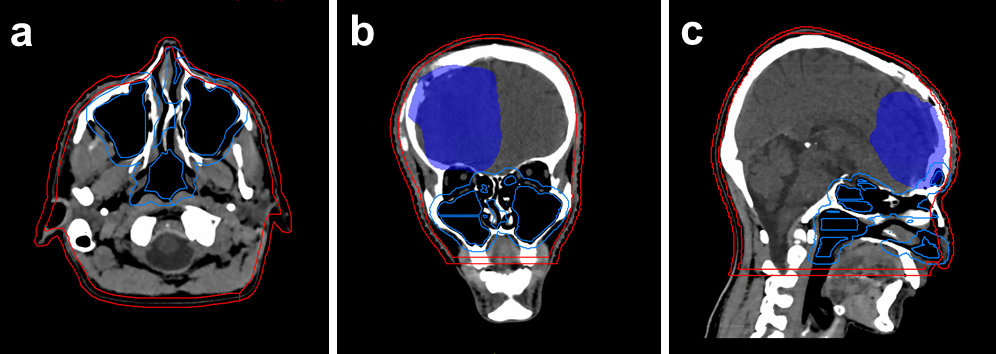


**Supplementary Figure 2**

Axial images for ten randomly selected patients with in vivo skin OSLD skin dose measurements. OSLD placements are indicated by yellow arrows. PTV is depicted in blue, CTV in green, and GTV in red


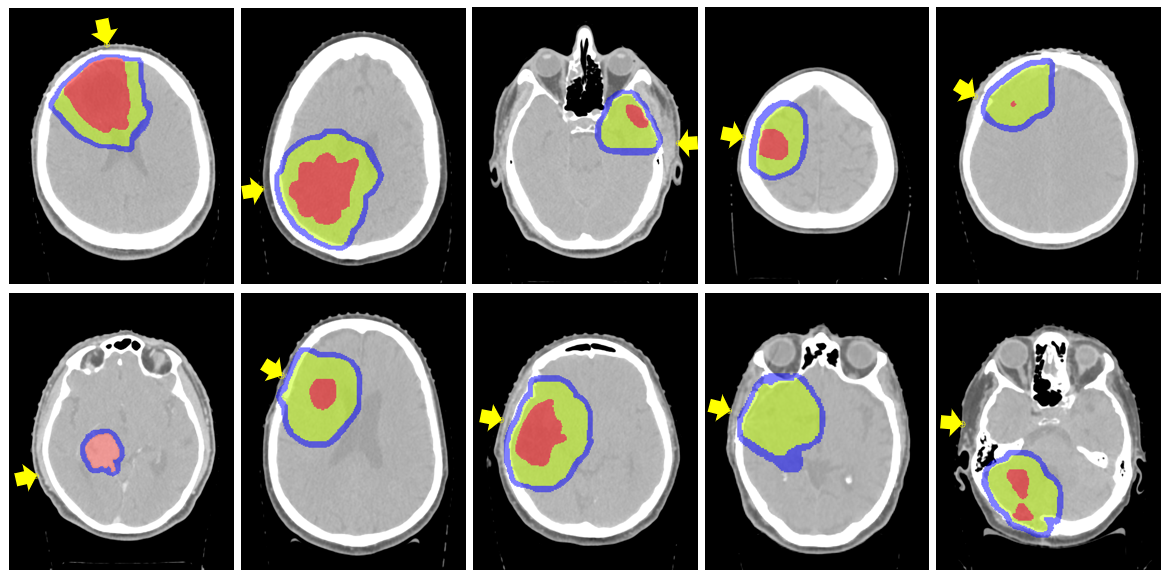

Supplement: Supplementary file 1 [file 43aa985c91e1803446c195c1.docx]
